# Supplementary material
Source: PubMed Central journal article supplement (PMC6204682)
Supplement: zjm999096133s1.pdf [file zjm999096133s1.pdf]

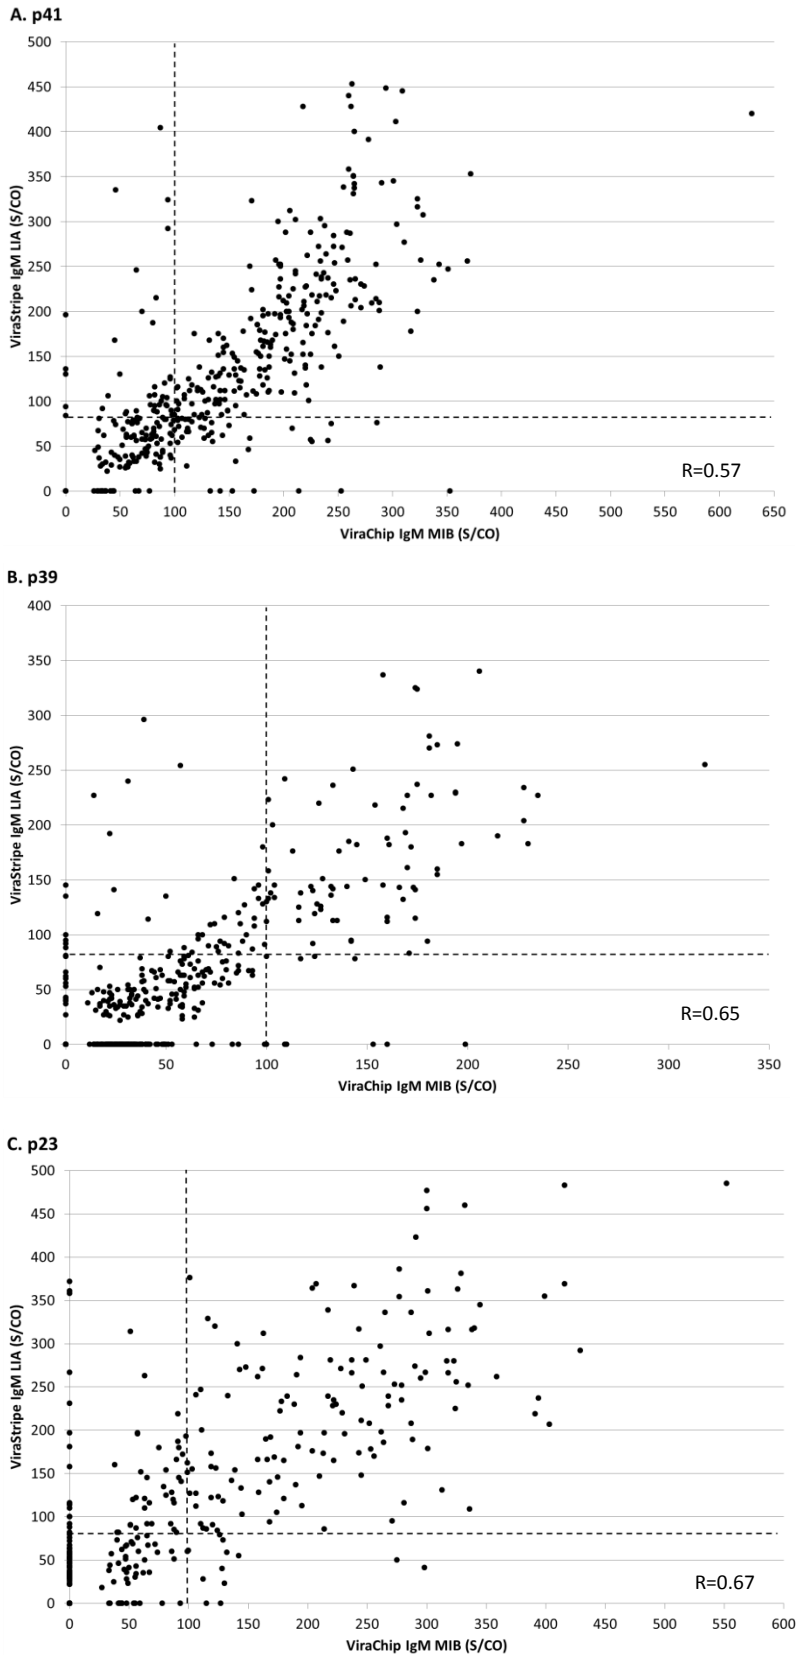

**Supplemental Figure 1.** Plots show S/CO ratios for the ViraChip IgM MIB versus the ViraStripe IgM LIA for *B. burgdorferi* antigens (A) p41, (B) p39 and (C) p23. Dotted lines indicate the S/CO ratio above which the qualitative interpretation is positive for the presence of IgM-class antibodies to the antigen (*i.e.*, S/CO  $\geq$ 100 for the ViraChip IgM MIB, S/CO  $\geq$ 80 for the ViraStripe IgM LIA). The Pearson's correlation coefficient ( $R$ ) was determined for the qualitative presence or absence of IgM antibodies at each *B. burgdorferi* protein.
