# Supplementary material
Source: PubMed Central journal article supplement (PMC6204682)
Supplement: zjm999096133s2.pdf [file zjm999096133s2.pdf]

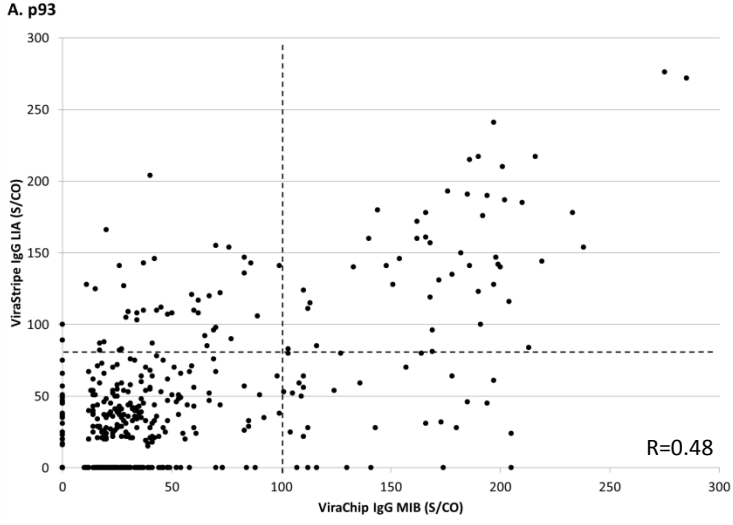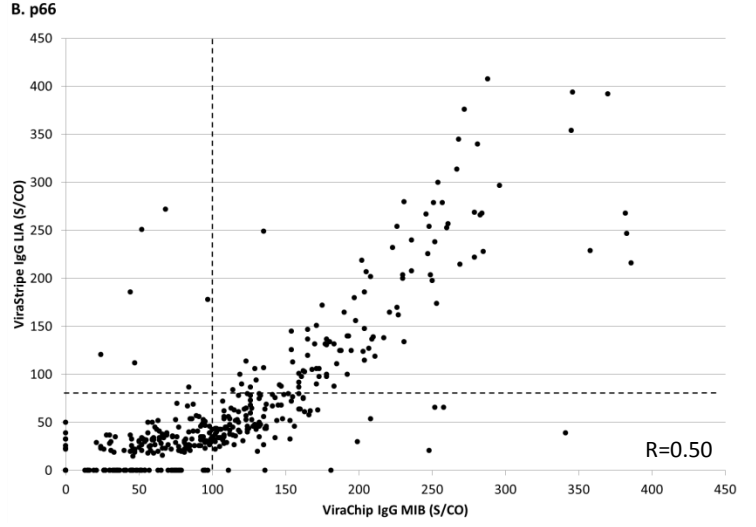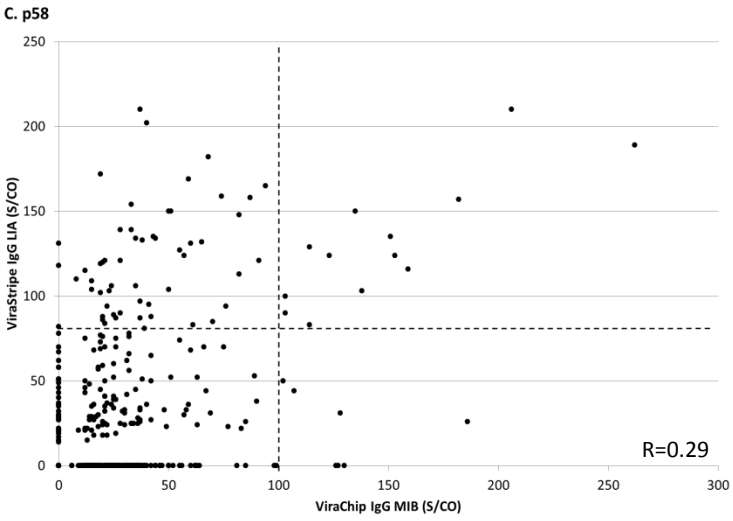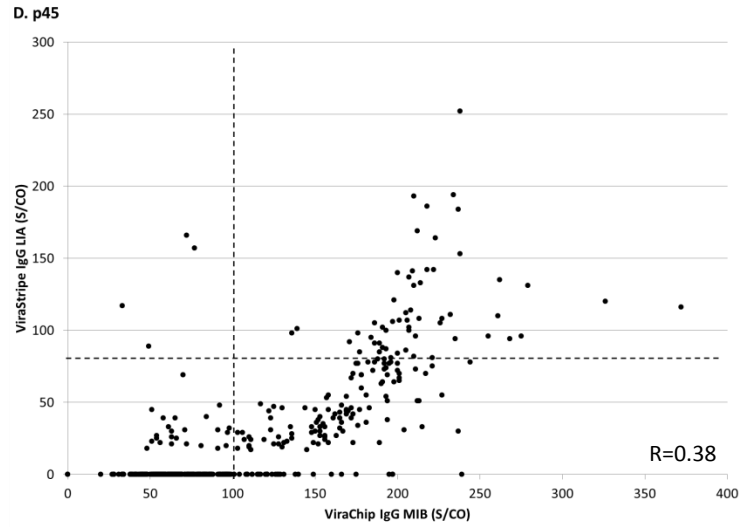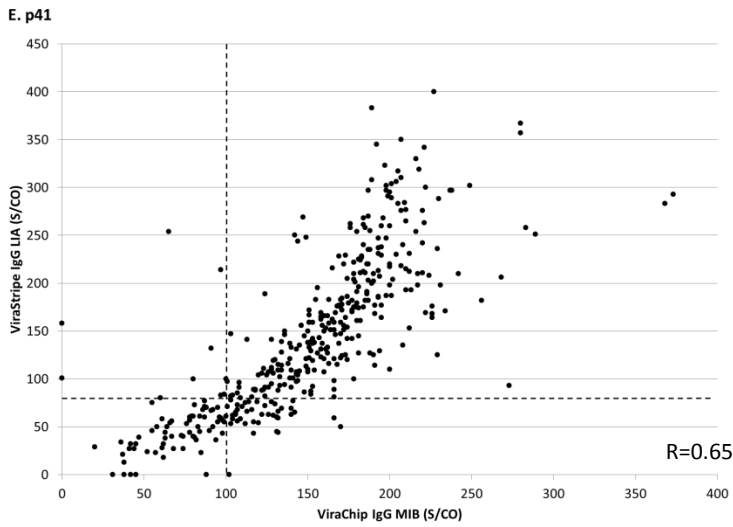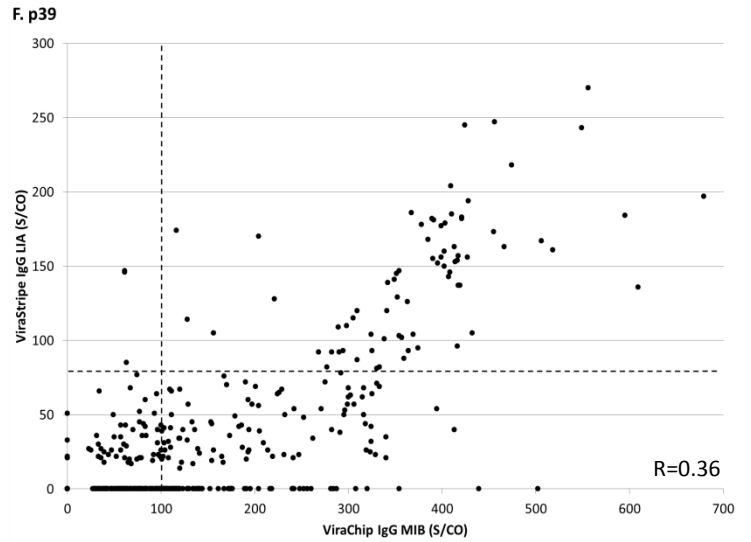

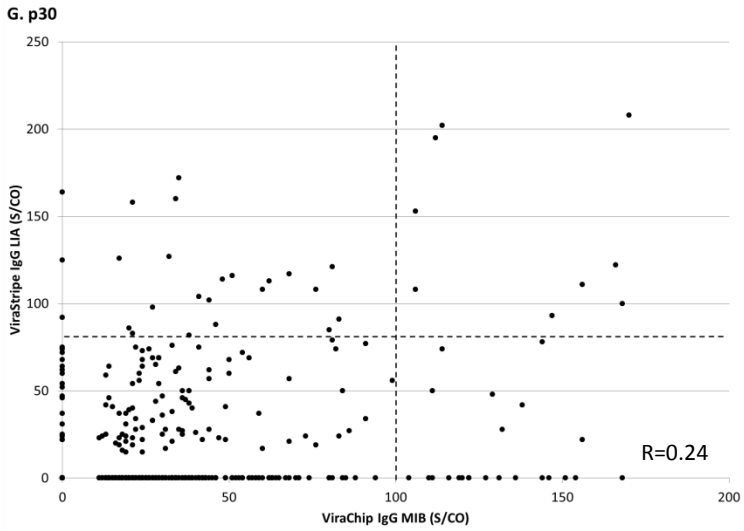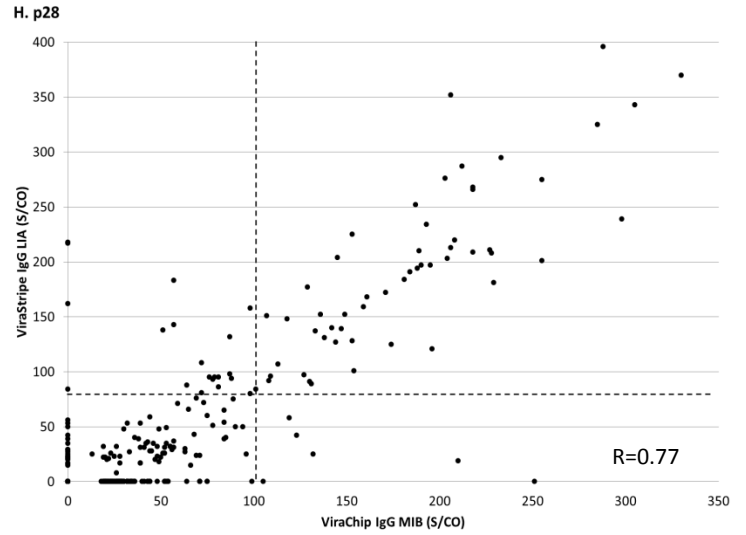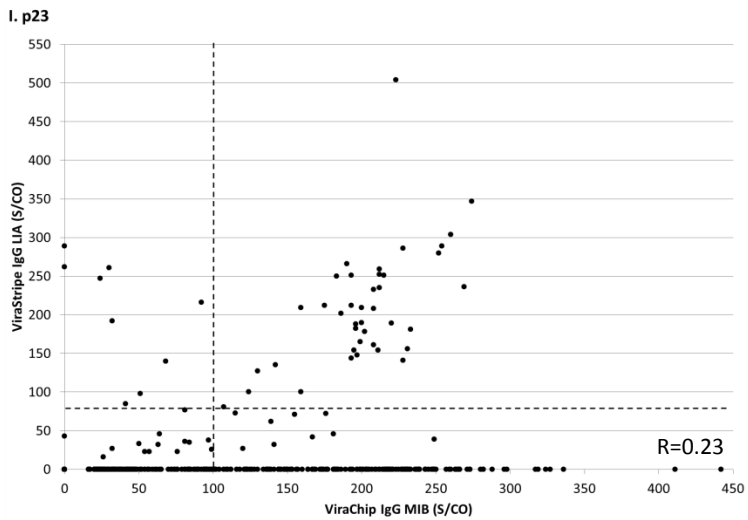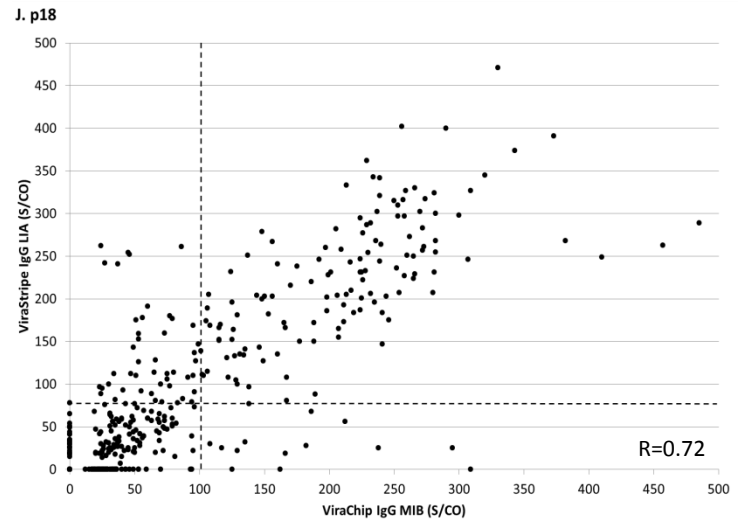

**Supplemental Figure 2.** Plots show *S/CO* ratios for the ViraChip IgG MIB versus the ViraStripe IgG LIA for *B. burgdorferi* antigens (A) p93, (B) p66 and (C) p58, (D) p45, (E) p41, (F) p39, (G) p30, (H) p28, (I) p23 and (J) p18. Dotted lines indicate the *S/CO* ratio above which the qualitative interpretation is positive for the presence of IgG-class antibodies to the antigen (*i.e.*,  $S/CO \geq 100$  for the ViraChip IgG MIB,  $S/CO \geq 80$  for the ViraStripe IgG LIA). The Pearson's correlation coefficient (*R*) was determined for the qualitative presence or absence of IgG antibodies at each *B. burgdorferi* protein.
